# Supplementary material for: Structural Characterization of the Chaetomium thermophilum TREX-2 Complex and its Interaction with the mRNA Nuclear Export Factor Mex67:Mtr2
Source: PubMed Central journal article supplement (PMC4509546; doi:10.1016/j.str.2015.05.002), 2015-07-07
Supplement: mmc1.pdf [file mmc1.pdf]

**Structure, Volume 23**

**Supplemental Information**

**Structural Characterization of the *Chaetomium*  
*thermophilum* TREX-2 Complex and its Interaction  
with the mRNA Nuclear Export Factor Mex67:Mtr2**

**Lyudmila Dimitrova, Eugene Valkov, Shintaro Aibara, Dirk Flemming, Stephen H. McLaughlin, Ed Hurt, and Murray Stewart**

## SUPPLEMENTARY MATERIAL

### Structural Characterization of the *Chaetomium thermophilum* TREX-2 Complex and its Interaction with the mRNA Nuclear Export Factor Mex67:Mtr2

Lyudmila Dimitrova<sup>1,2</sup>, Eugene Valkov<sup>1</sup>, Shintaro Aibara<sup>1</sup>, Dirk Flemming<sup>2</sup>, Stephen H. McLaughlin<sup>1</sup>, Ed Hurt<sup>2</sup> and Murray Stewart<sup>1</sup>

<sup>1</sup>MRC Laboratory of Molecular Biology, Francis Crick Ave., Cambridge CB2 0QH, UK and <sup>2</sup>Biochemie-Zentrum der Universität Heidelberg, INF328, D-69120 Heidelberg, Germany.

### Supplementary Experimental Procedures

**Strains and plasmids:** *ctTHP1* was cloned into the BamHI and EcoRI sites of pET-Duet-1 (Novagen) in frame with the His<sub>6</sub> tag, with *ctSEM1* cloned in the second multiple cloning site (MCS) via NdeI/XhoI. *ctSAC3*<sup>M415-755</sup> together with an additional ribosomal binding site was cloned into EcoRI/Pst1 sites of pET-Duet-1-HIS<sub>6</sub>-*ctTHP1*-*ctSEM1*. *ctSUS1* was cloned into BamHI/SacI in frame with a HIS<sub>6</sub> tag, whereas *ctCDC31* was cloned between the NdeI and XhoI sites in the second MCS. *ctSAC3-CID*<sup>1085-1170</sup> was inserted between NdeI and BamHI sites of pET24d-GST-TEV. For TREX-2, reconstitution *ctSAC3*<sup>1-1191</sup>-FLAG was inserted at the NdeI/BamHI sites of YEplac112(TRP1)-pGal1-10-pA-TEV(Leu2d). His<sub>6</sub>-*ctSUS1* was cloned in the P1 site of YEplac195(URA1)-P2-pGal1-10-P1 and *ctCDC31* was cloned in the P2 site. For pull-down assays, *ctMLP1-C* and truncations, *ctSAC3*<sup>1-755</sup> and truncations, Nup145<sup>213-567</sup>, *ctCRM1*, *ctKAP104* were cloned into the NdeI/BamHI sites of pET24d-GST-TEV. *ctMEX67* truncations and *ctMTR2* were cloned into the BamHI/EcoRI sites and NdeI/XhoI sites of pET-Duet-1, respectively. For the growth and mRNA export assays *sac3Δ(G1)* strain was transformed with pRS314(TRP), pRS314-Sac3 and pRS314-Sac3<sup>140-1301</sup>. To check the localization of wt and mutant Sac3, GFP was inserted at a BamHI site at the Sac3 N-terminus.

**Growth Assays** Cells were freshly plated overnight on SDC-TRP plates. On the following day, they were diluted to OD<sub>600</sub> = 1 after which they were spotted in 10 fold dilutions on SDC-TRP and grown for 3 days at 23°C, 30°C and 37°C.

**Analysis of mRNA nuclear export by *in situ* hybridization and fluorescent microscopy** GFP labelled SAC3 and mutant were grown in selective media at 30°C to logarithmic growth. For the *in situ* hybridization cells were grown at 30°C at selective media before being fixed. Analysis of poly(A)<sup>+</sup> RNA export by *in situ* hybridization was carried out using Cy3-labeled oligo(dT) probes essentially as described in Amberg et al. (1992). For fluorescence microscopy, an Imager Z1 (Carl Zeiss) with a 63× NA 1.4 plan apochromat oil immersion lens (Carl Zeiss) and DICIII, 4',6-diamidino-2-phenylindole, HECy3 or HEeGFP filter sets were used. Images were acquired with an AxioCamMRm camera (Carl Zeiss) and AxioVision 4.3 (Carl Zeiss) at resolution 1,388 × 1,040 (Binning 1×1, gain factor 1).

**Table S1. Plasmids and yeast strains, related to Experimental Procedures**

| Plasmids                                                     | Origin                     |
|--------------------------------------------------------------|----------------------------|
| pET-Duet-1- <i>HIS6-ctTHP1-ctSEM1</i>                        | This study                 |
| pET-Duet-1- <i>HIS6-ctTHP1-ctSAC3M(415-755)-ctSEM1</i>       | This study                 |
| pET-Duet-1- <i>HIS6-ctSUS1-ctCDC31</i>                       | This study                 |
| pET24d- <i>GST-TEV- ctSAC3-CID(1085-1170)</i>                | This study                 |
| YEplac112 (TRP1)- <i>pGAL1-10-pA-TEV-ctSac3(1-1191)-FLAG</i> | This study                 |
| YEplac195(URA1)- <i>ctCDC31-pGAL1-10-HIS6-ctSUS1</i>         | This study                 |
| pET24d- <i>GST-TEV- ctSAC3(1-784)</i>                        | This study                 |
| pET24d- <i>GST-TEV- ctSAC3(1-112)</i>                        | This study                 |
| pET24d- <i>GST-TEV- ctSAC3(1-112)</i>                        | This study                 |
| pET24d- <i>GST-TEV- ctSAC3(21-784)</i>                       | This study                 |
| pET24d- <i>GST-TEV- ctSAC3(44-784)</i>                       | This study                 |
| pET24d- <i>GST-TEV- ctSAC3(105-784)</i>                      | This study                 |
| pET24d- <i>GST-TEV- ctNUP145(213-567)</i>                    | This study                 |
| pET24d- <i>GST-TEV- ctKAP104</i>                             | Kressler et al. (2012)     |
| pET24d- <i>GST-TEV- ctCRM1</i>                               | Monecke et al. (2013)      |
| pETDuet-1- <i>HIS6-ctMEX67()-ctMTR2</i>                      | This study                 |
| pETDuet-1- <i>HIS6-TEV-ctMEX67(NTF2L)-ctMTR2</i>             | This study                 |
| pETDuet-1- <i>HIS6-MEX67(UBA)</i>                            | This study                 |
| pET24d- <i>HIS6-TEV- ctSac3(44-94)</i>                       | This study                 |
| pET24d- <i>GST-TEV- ctMLP1(1797-2085)</i>                    | This study                 |
| pET24d- <i>GST-TEV- ctMLP1(1797-1960)</i>                    | This study                 |
| pET24d- <i>GST-TEV- ctMLP1(1797-1916)</i>                    | This study                 |
| pET24d- <i>GST-TEV- ctMLP1(1797-1887)</i>                    | This study                 |
| pET24d- <i>GST-TEV- ctMLP1(1959-2085)</i>                    | This study                 |
| pRS314(TRP)                                                  | Sikorski and Hieter (1989) |
| pRS314- <i>SAC3</i>                                          | Ellisdon et al. (2012)     |
| pRS314- <i>SAC3 (140-1301)</i>                               | This study                 |
| pRS314- <i>GFP-SAC3</i>                                      | This study                 |
| pRS314- <i>GFP-SAC3 (140-1301)</i>                           | This study                 |

  

| Strains          | Origin                |
|------------------|-----------------------|
| DS1-2b           | Nissan et al. (2002)  |
| <i>sac3Δ(G1)</i> | Fischer et al. (2002) |

A

Sac3

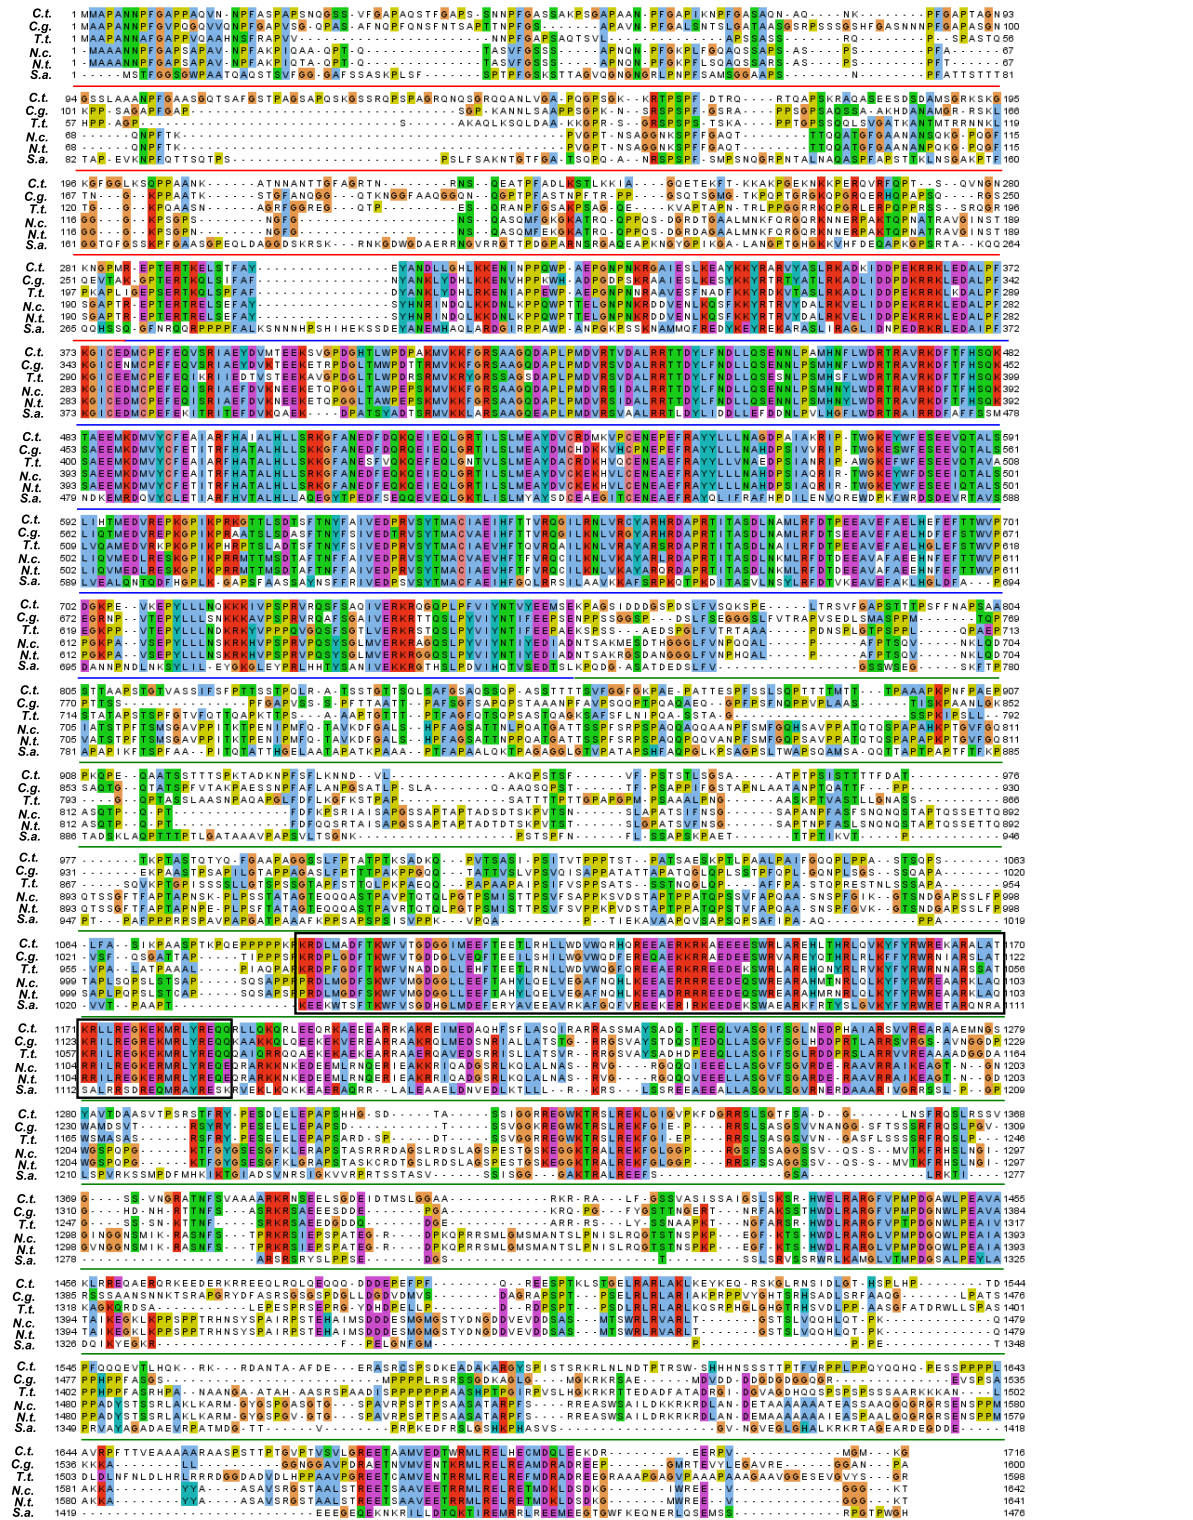

Supplementary Figure S1A, related to Figure 1: (A) Multiple sequence alignment of Sac3 (*Chaetomium thermophilum* (C.t.), *Chaetomium globosum* (C.g.), *Thielavia terrestris* (T.t.), *Neurospora crassa* (N.c.), *Neurospora tetrasperma* (N.t.) and *Scedosporium apiospermum* (S.a.).



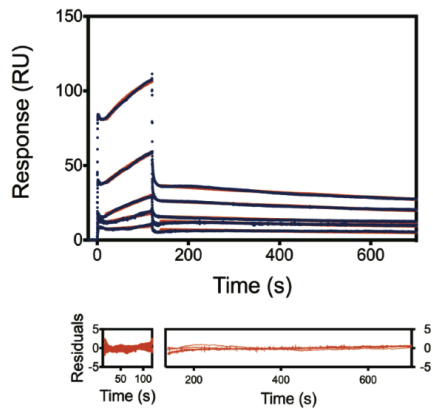

**Supplementary Figure S2, related to Figure 2.** Binding of the Sac3<sup>CID</sup>:Cdc31:Sus1 complex to the Sac3 N-terminus analyzed by Surface Plasmon Resonance. Both the on- and off-rate constants were very slow ( $k_a = 235 \text{ M}^{-1} \text{ s}^{-1}$  and  $k_d = 5.2 \times 10^{-4} \text{ s}^{-1}$  with the overall equilibrium constant  $K_d$  equating to  $2.2 \mu\text{M}$ ).

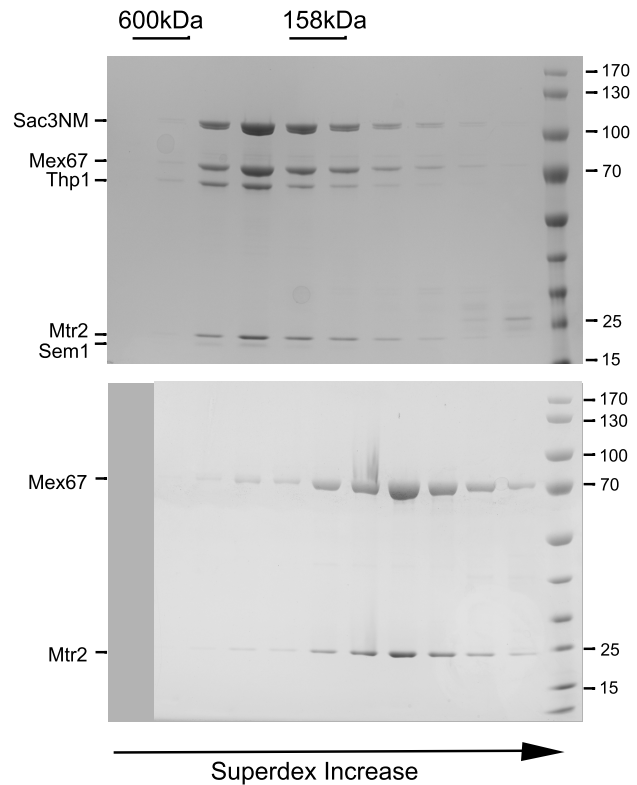

**Supplementary Figure S3, related to Figure 4.** Comparison of the size exclusion chromatography of the *ct*Sac3NM:Thp1:Sem1:Mex67:Mtr2 pentameric complex and the *ct*Mex67:Mtr2 complex. The *in vitro* reconstituted pentameric complex and *ct*Mex67:Mtr2 were loaded onto a Superdex 200 increase size exclusion column. The fractions were analysed by SDS-PAGE and stained by Coomassie.

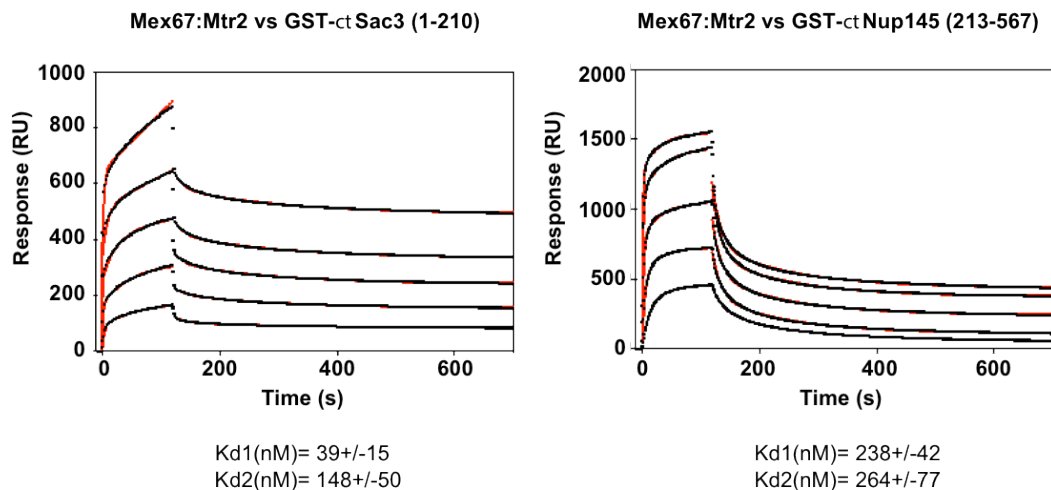

**Supplementary Figure S4, related to Table 2 and Figure 5.** SPR analysis of the binding of *ct*Mex67:Mtr2 to *ct*Sac3 (1-210) and *ct*Nup145N. The data were fitted to a two-phase model with  $K_{d1}$  and  $K_{d2}$  depicted under the sensograms.

A

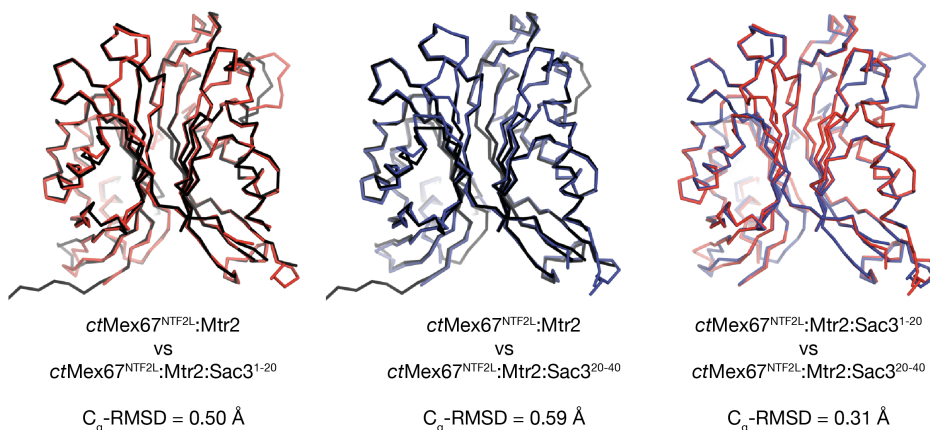

B

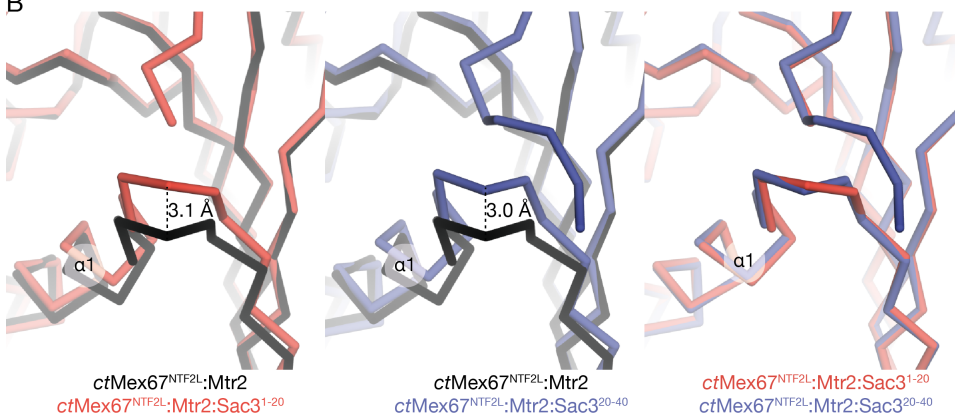

**Supplementary Figure S5, related to Figure 5.** Conformational changes in the pre- $\alpha 1$  loop of Mex67<sup>NTF2L</sup> on binding different peptides. Whereas binding of either Sac3<sup>1-20</sup> or Sac3<sup>20-40</sup> produced a  $\sim 3$  Å shift in the pre- $\alpha 1$  loop, binding a FG peptide produced little change.

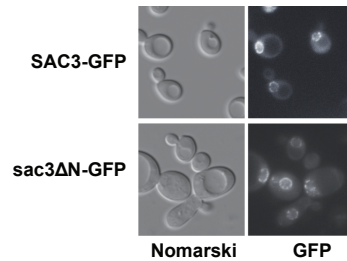

**Supplementary Figure S6, related to Figure 6. Deletion of Sac3N residues 1-136 does not inhibit Sac3-GFP binding to NPCs.** Both SAC3-GFP (pRS315-GFP-SAC3) and Sac3 (140-1301)-GFP shown nuclear rim staining in *S. cerevisiae* cells.

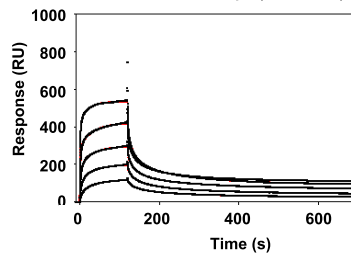

**Supplementary Figure S7, related to Table 2 and Figure 7. SPR analysis of the binding of ctMlp1 NPGF motifs to ctMex67:Mtr2.**

## SUPPLEMENTARY REFERENCES

- Amberg, D.C., Goldstein, A.L. and Cole, C.N. 1992. Isolation and characterization of RAT1: an essential gene of *Saccharomyces cerevisiae* required for the efficient nucleocytoplasmic trafficking of mRNA. *Genes Dev.* *6*, 1173-1189.
- Ellisdon, A.M., Dimitrova, L., Hurt, E. and Stewart, M. 2012. Structural basis for the assembly and nucleic acid binding of the TREX-2 transcription-export complex. *Nature Struct. Mol. Biol.* *19*, 328-336.
- Fischer, T., Strässer, K., Rácz, A., Rodriguez-Navarro, S., Oppizzi, M., Ihrig, P., Lechner, J. and Hurt, E. 2002. The mRNA export machinery requires the novel Sac3p-Thp1p complex to dock at the nucleoplasmic entrance of the nuclear pores. *EMBO J.* *21*, 5843-5852.
- Kressler, D., Bange, G., Ogawa, Y., Stjepanovic, G., Bradatsch, B., Pratte, D., Amlacher, S., Strauß, D., Yoneda, Y., Katahira, J., Sinning, I. and Hurt, E. 2012. Synchronizing nuclear import of ribosomal proteins with ribosome assembly. *Science.* *338*, 666-671.
- Monecke, T., Haselbach, D., Voß, B., Russek, A., Neumann, P., Thomson, E., Hurt, E., Zachariae, U., Stark, H., Grubmüller, H., Dickmanns, A. and Ficner, R. 2013. Structural basis for cooperativity of CRM1 export complex formation. *Proc. Natl. Acad. Sci., USA.* *110*, 960-965.
- Nissan, T.A., Bassler, J., Petfalski, E., Tollervy, D. and Hurt, E. 2002. 60S pre-ribosome formation viewed from assembly in the nucleolus until export to the cytoplasm. *EMBO J.* *21*, 5539-5547.
- Sikorski, R.S. and Hieter, P. 1989. A system of shuttle vectors and yeast host strains designed for efficient manipulation of DNA in *Saccharomyces cerevisiae*. *Genetics.* *122*, 19-27.
